# Supplementary material for: Epithelial-Myeloid cell crosstalk regulates acinar cell plasticity and pancreatic remodeling in mice
Source: eLife journal article supplement (doi:10.7554/elife.27388), 2017-10-05
Supplement: supp [file elife-27388-supp-v1.zip]

Archive with 11 entries (11 files):
- elife_poa_e27388_Figure_5_Figure_Supplement_2.tif
- elife_poa_e27388_Figure_5_figure_supplement_1.tif
- elife_poa_e27388_Figure_6_figure_supplement_1.tif
- elife_poa_e27388_Figure_4_figure_supplement_1.tif
- elife_poa_e27388_Figure_1_source_data_1.xlsx
- elife_poa_e27388_Figure_3_figure_supplement_1.tif
- elife_poa_e27388_Figure1_figure_supplement_1.tif
- elife_poa_e27388_Supplemementary_File_1.docx
- elife_poa_e27388_Transparent_Reporting_File.pdf
- elife_poa_e27388_Supplementary_File_2.docx
- elife_poa_e27388_Figure_2_figure_supplement_1.tif
