# Supplementary material for: Epithelial-Myeloid cell crosstalk regulates acinar cell plasticity and pancreatic remodeling in mice
Source: eLife journal article supplement (doi:10.7554/elife.27388), 2017-10-05
Supplement: supp [file elife-27388-supp-v1.zip › elife_poa_e27388_Figure_1_source_data_1.xlsx]

## Sheet: ikras;il6+dox3w
		Acinar	ADM	PanIN 1A	PanIN 1B	PanIN 2	PanIN 3		Acinar	ADM	PanIN 1A	PanIN 1B	PanIN 2	PanIN 3		Acinar	ADM	PanIN 1A	PanIN 1B	PanIN 2	PanIN 3		Acinar	ADM	PanIN 1A	PanIN 1B	PanIN 2	PanIN 3
+Doxy 3w	7054		2	3	2	2	1	7186	6	2	2				10129	0	1	5	4	0	0	8607	0	0	4	5	1	0
				6	2	2			2	2	1	2	3			0	2	1	1	6	0		0	2	3	4	1	0
				9	1					6	2	2				0	4	3	2	1	0		0	0	5	2	3	0
			2	7	2				6	4						2	5	3	0	0	0		0	3	4	0	3	0
			3	4	2	1			5	5						1	5	4	0	0	0		0	7	2	1	0	0
	Percentage	0	14	58	18	10	2		38	38	10	8	6	0		6	34	32	14	14	0		0	24	36	24	16	0
	% total	11	27.5	34	16	11.5	0.5
	SE	9.11043	5.37742	9.83192	3.3665	2.21736	0.5

## Sheet: SHEET1
		Acinar	ADM	PanIN 1A	PanIN 1B	PanIN 2	PanIN 3		Acinar	ADM	PanIN 1A	PanIN 1B	PanIN 2	PanIN 3		Acinar	ADM	PanIN 1A	PanIN 1B	PanIN 2	PanIN 3
iKras* Ctrl	A112	0	0	2	3	5	0	A113	0	1	2	4	3	0	14272	0	1	3	3	3	0
		0	1	2	3	4	0		0	1	3	3	3	0		0	1	4	3	2	0
		0	1	2	3	4	0		0	0	3	3	4	0		0	2	5	1	3	0
		0	1	3	4	2	0		0	0	5	3	2	0		0	1	3	4	2	0
		0	1	3	3	2	1		0	0	3	3	3	1		0	1	4	3	2	0
	Percentage	0	8	24	32	34	2		0	4	32	32	30	2		0	12	38	28	24	0
	MEAN	0	8	31.3333	30.6667	29.3333	1.33333
	SE	0	2.30947	4.05529	1.33337	2.90602	0.666686
		Acinar	ADM	PanIN 1A	PanIN 1B	PanIN 2	PanIN 3		Acinar	ADM	PanIN 1A	PanIN 1B	PanIN 2	PanIN 3		Acinar	ADM	PanIN 1A	PanIN 1B	PanIN 2	PanIN 3
iKras*;CD11b-DTRDT	A115	2	4	4	0	0	0	A123	0	3	7	0	0	0	A124	6	3	1	0	0	0
		5	4	1	0	0	0		0	4	6	0	0	0		5	5	0	0	0	0
		7	3	0	0	0	0		0	3	7	0	0	0		9	1	0	0	0	0
		6	4	0	0	0	0		5	5	0	0	0	0		6	4	0	0	0	0
		6	4	0	0	0	0		1	5	4	0	0	0		3	4	3	0	0	0
	Percentage	52	38	10	0	0	0		12	40	48	0	0	0		58	34	8	0	0	0
	MEAN	40.6667	37.3333	22	0	0	0
	SE	14.438	1.76389	13.0132	0	0	0
		p=0.048	p=0.0005
