# Supplementary figures and images for: Epithelial-Myeloid cell crosstalk regulates acinar cell plasticity and pancreatic remodeling in mice
Source: eLife journal article supplement (doi:10.7554/elife.27388), 2017-10-05

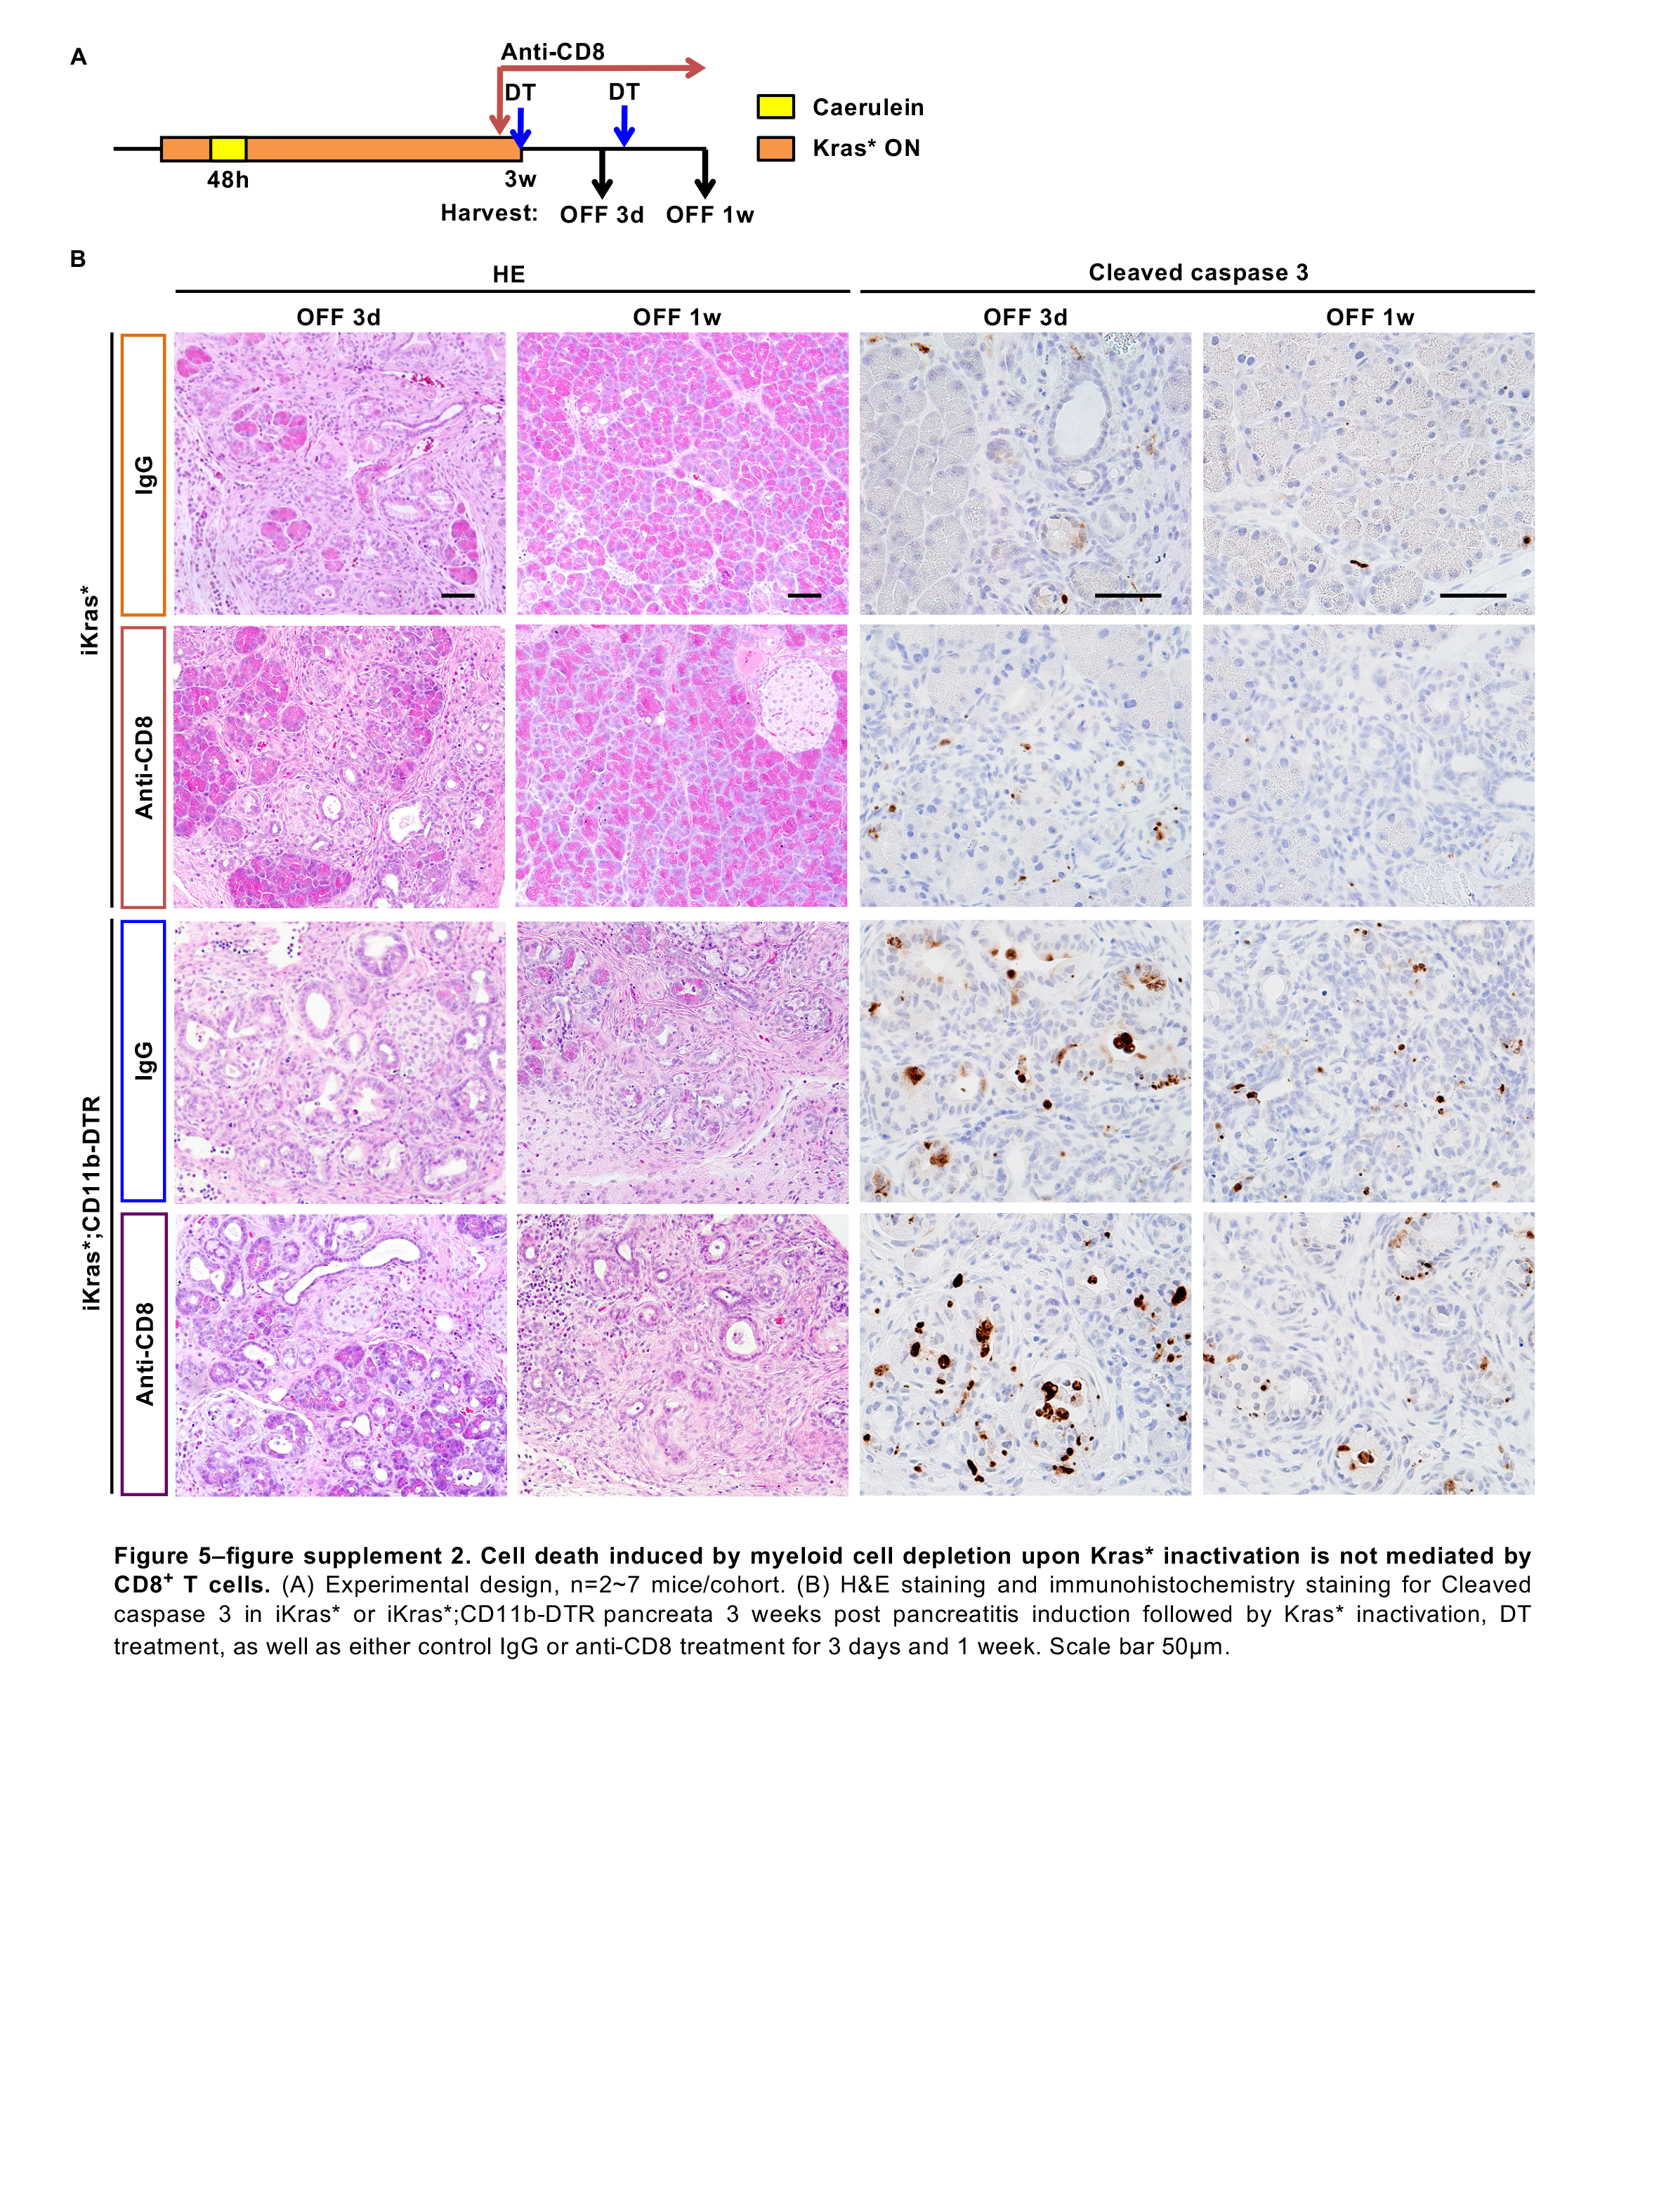

Supplement: supp [file elife-27388-supp-v1.zip › elife_poa_e27388_Figure_5_Figure_Supplement_2.tif]

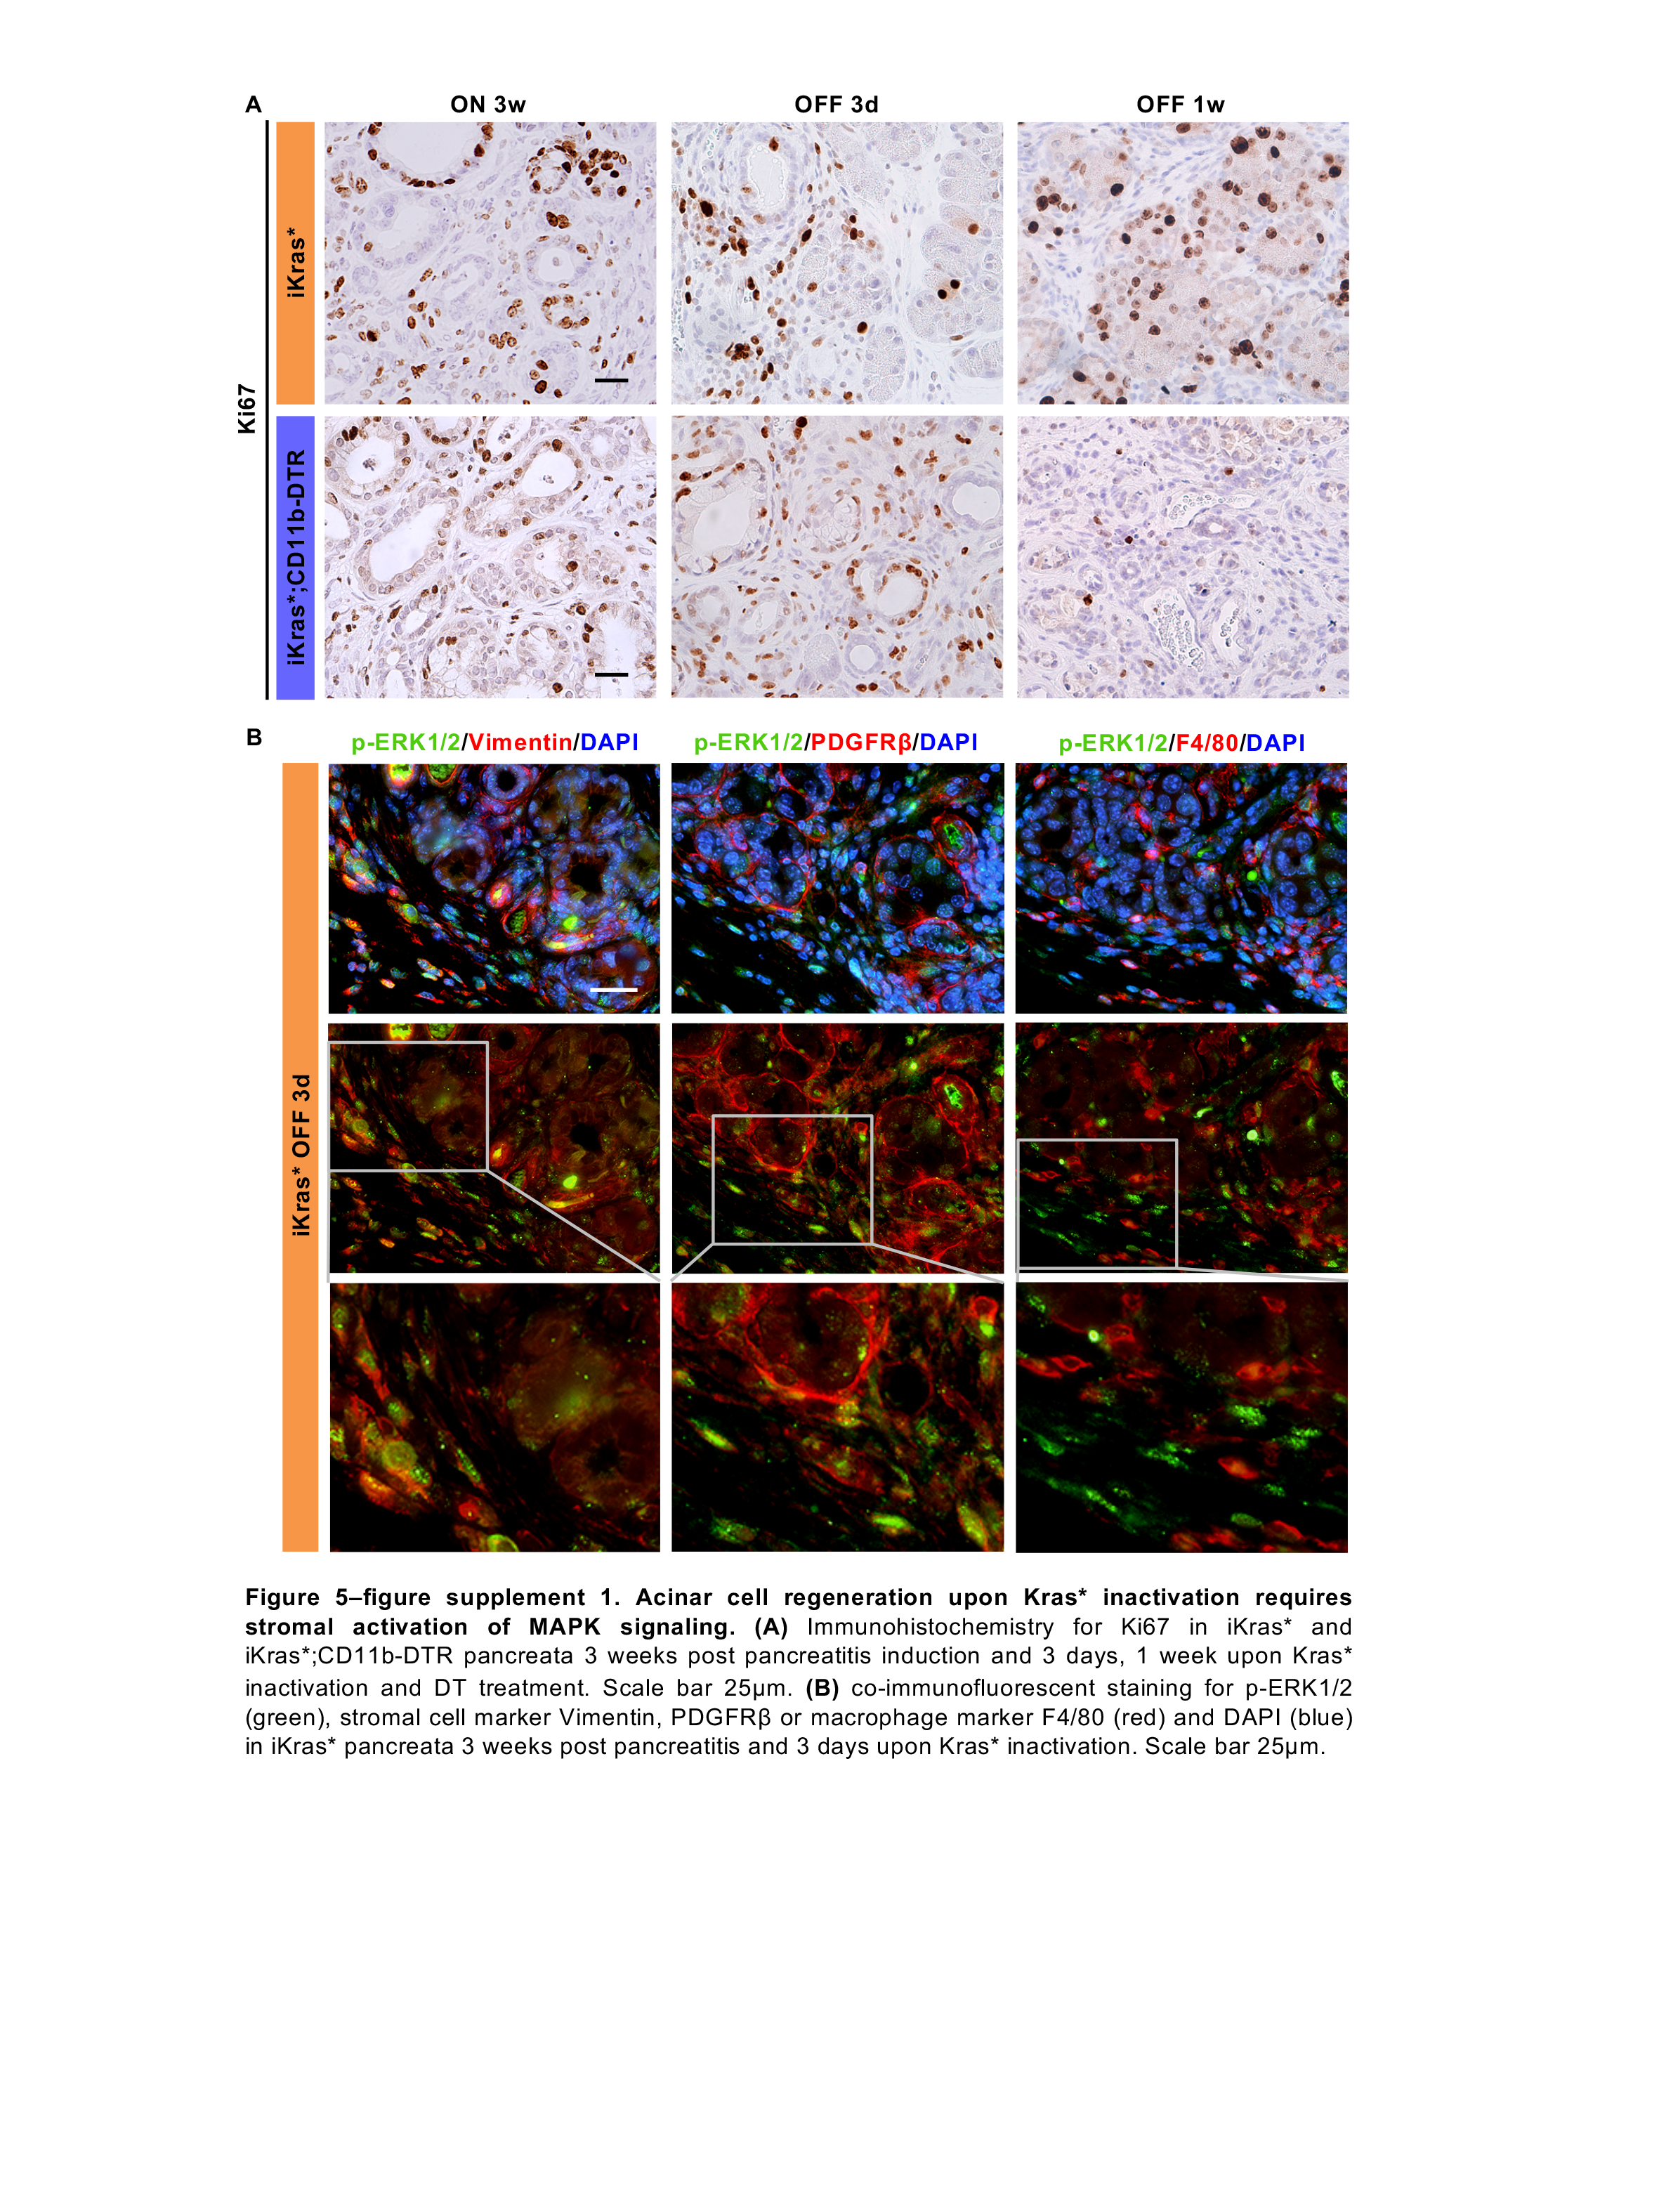

Supplement: supp [file elife-27388-supp-v1.zip › elife_poa_e27388_Figure_5_figure_supplement_1.tif]

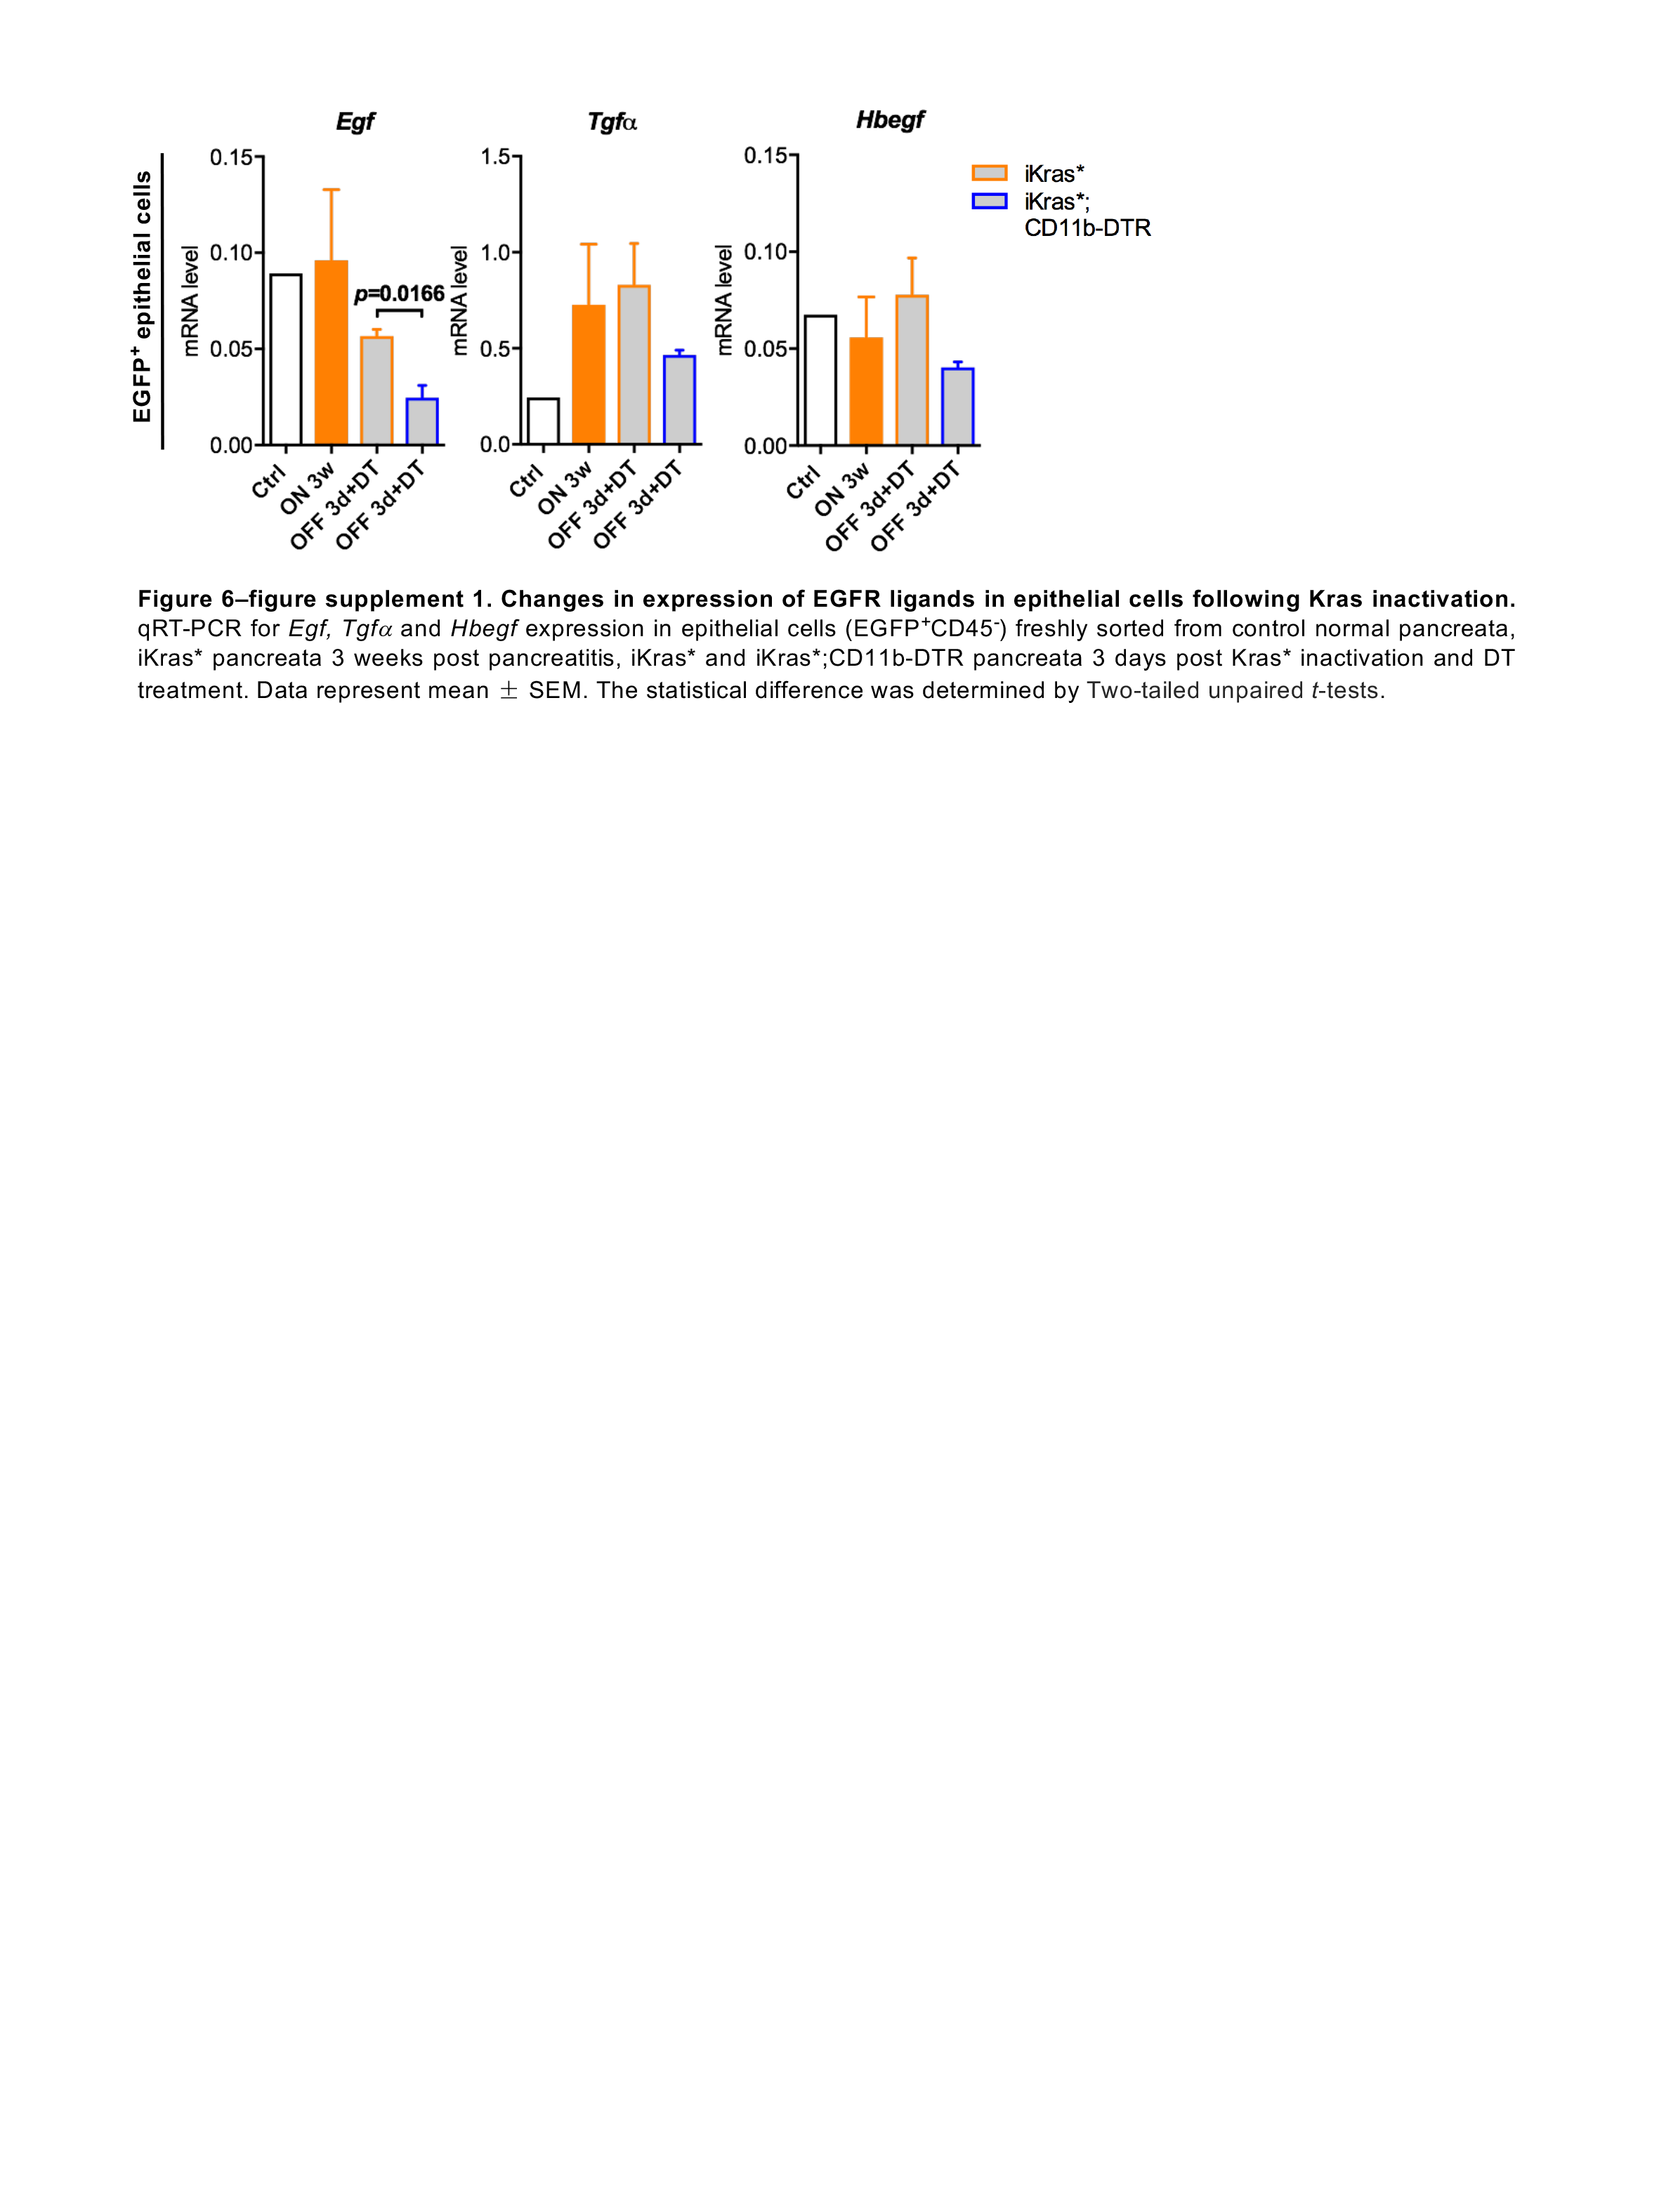

Supplement: supp [file elife-27388-supp-v1.zip › elife_poa_e27388_Figure_6_figure_supplement_1.tif]

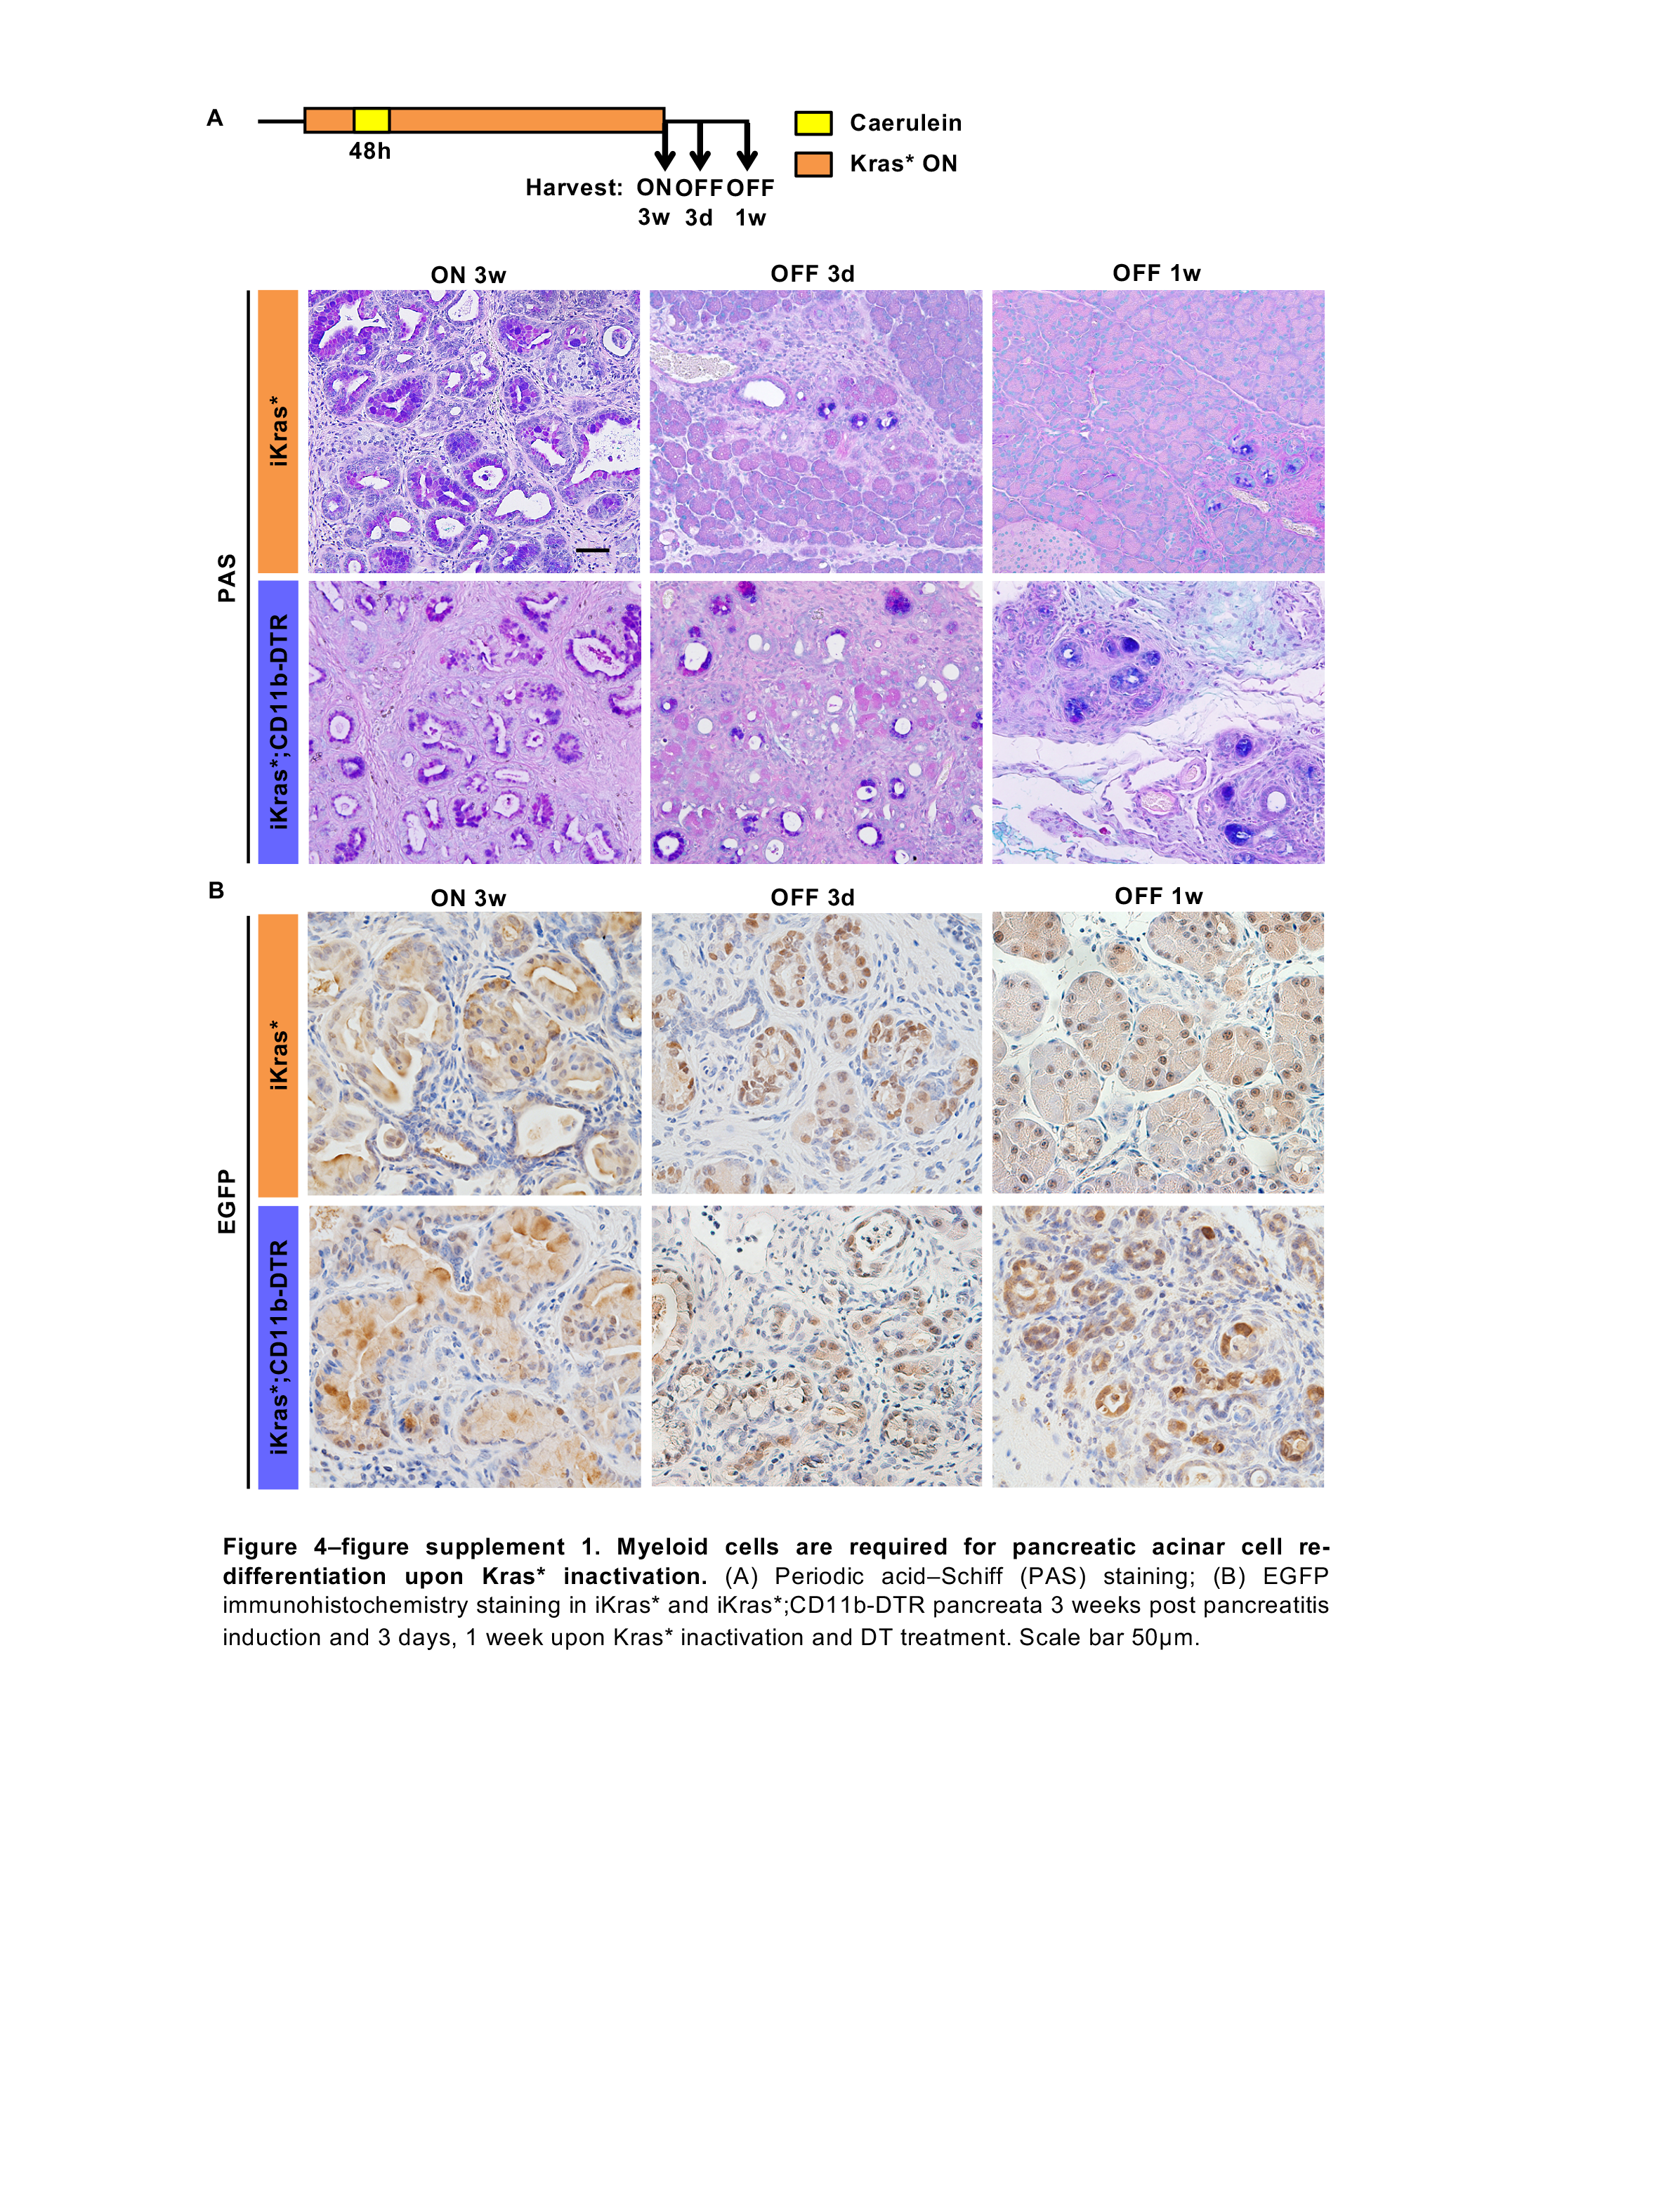

Supplement: supp [file elife-27388-supp-v1.zip › elife_poa_e27388_Figure_4_figure_supplement_1.tif]

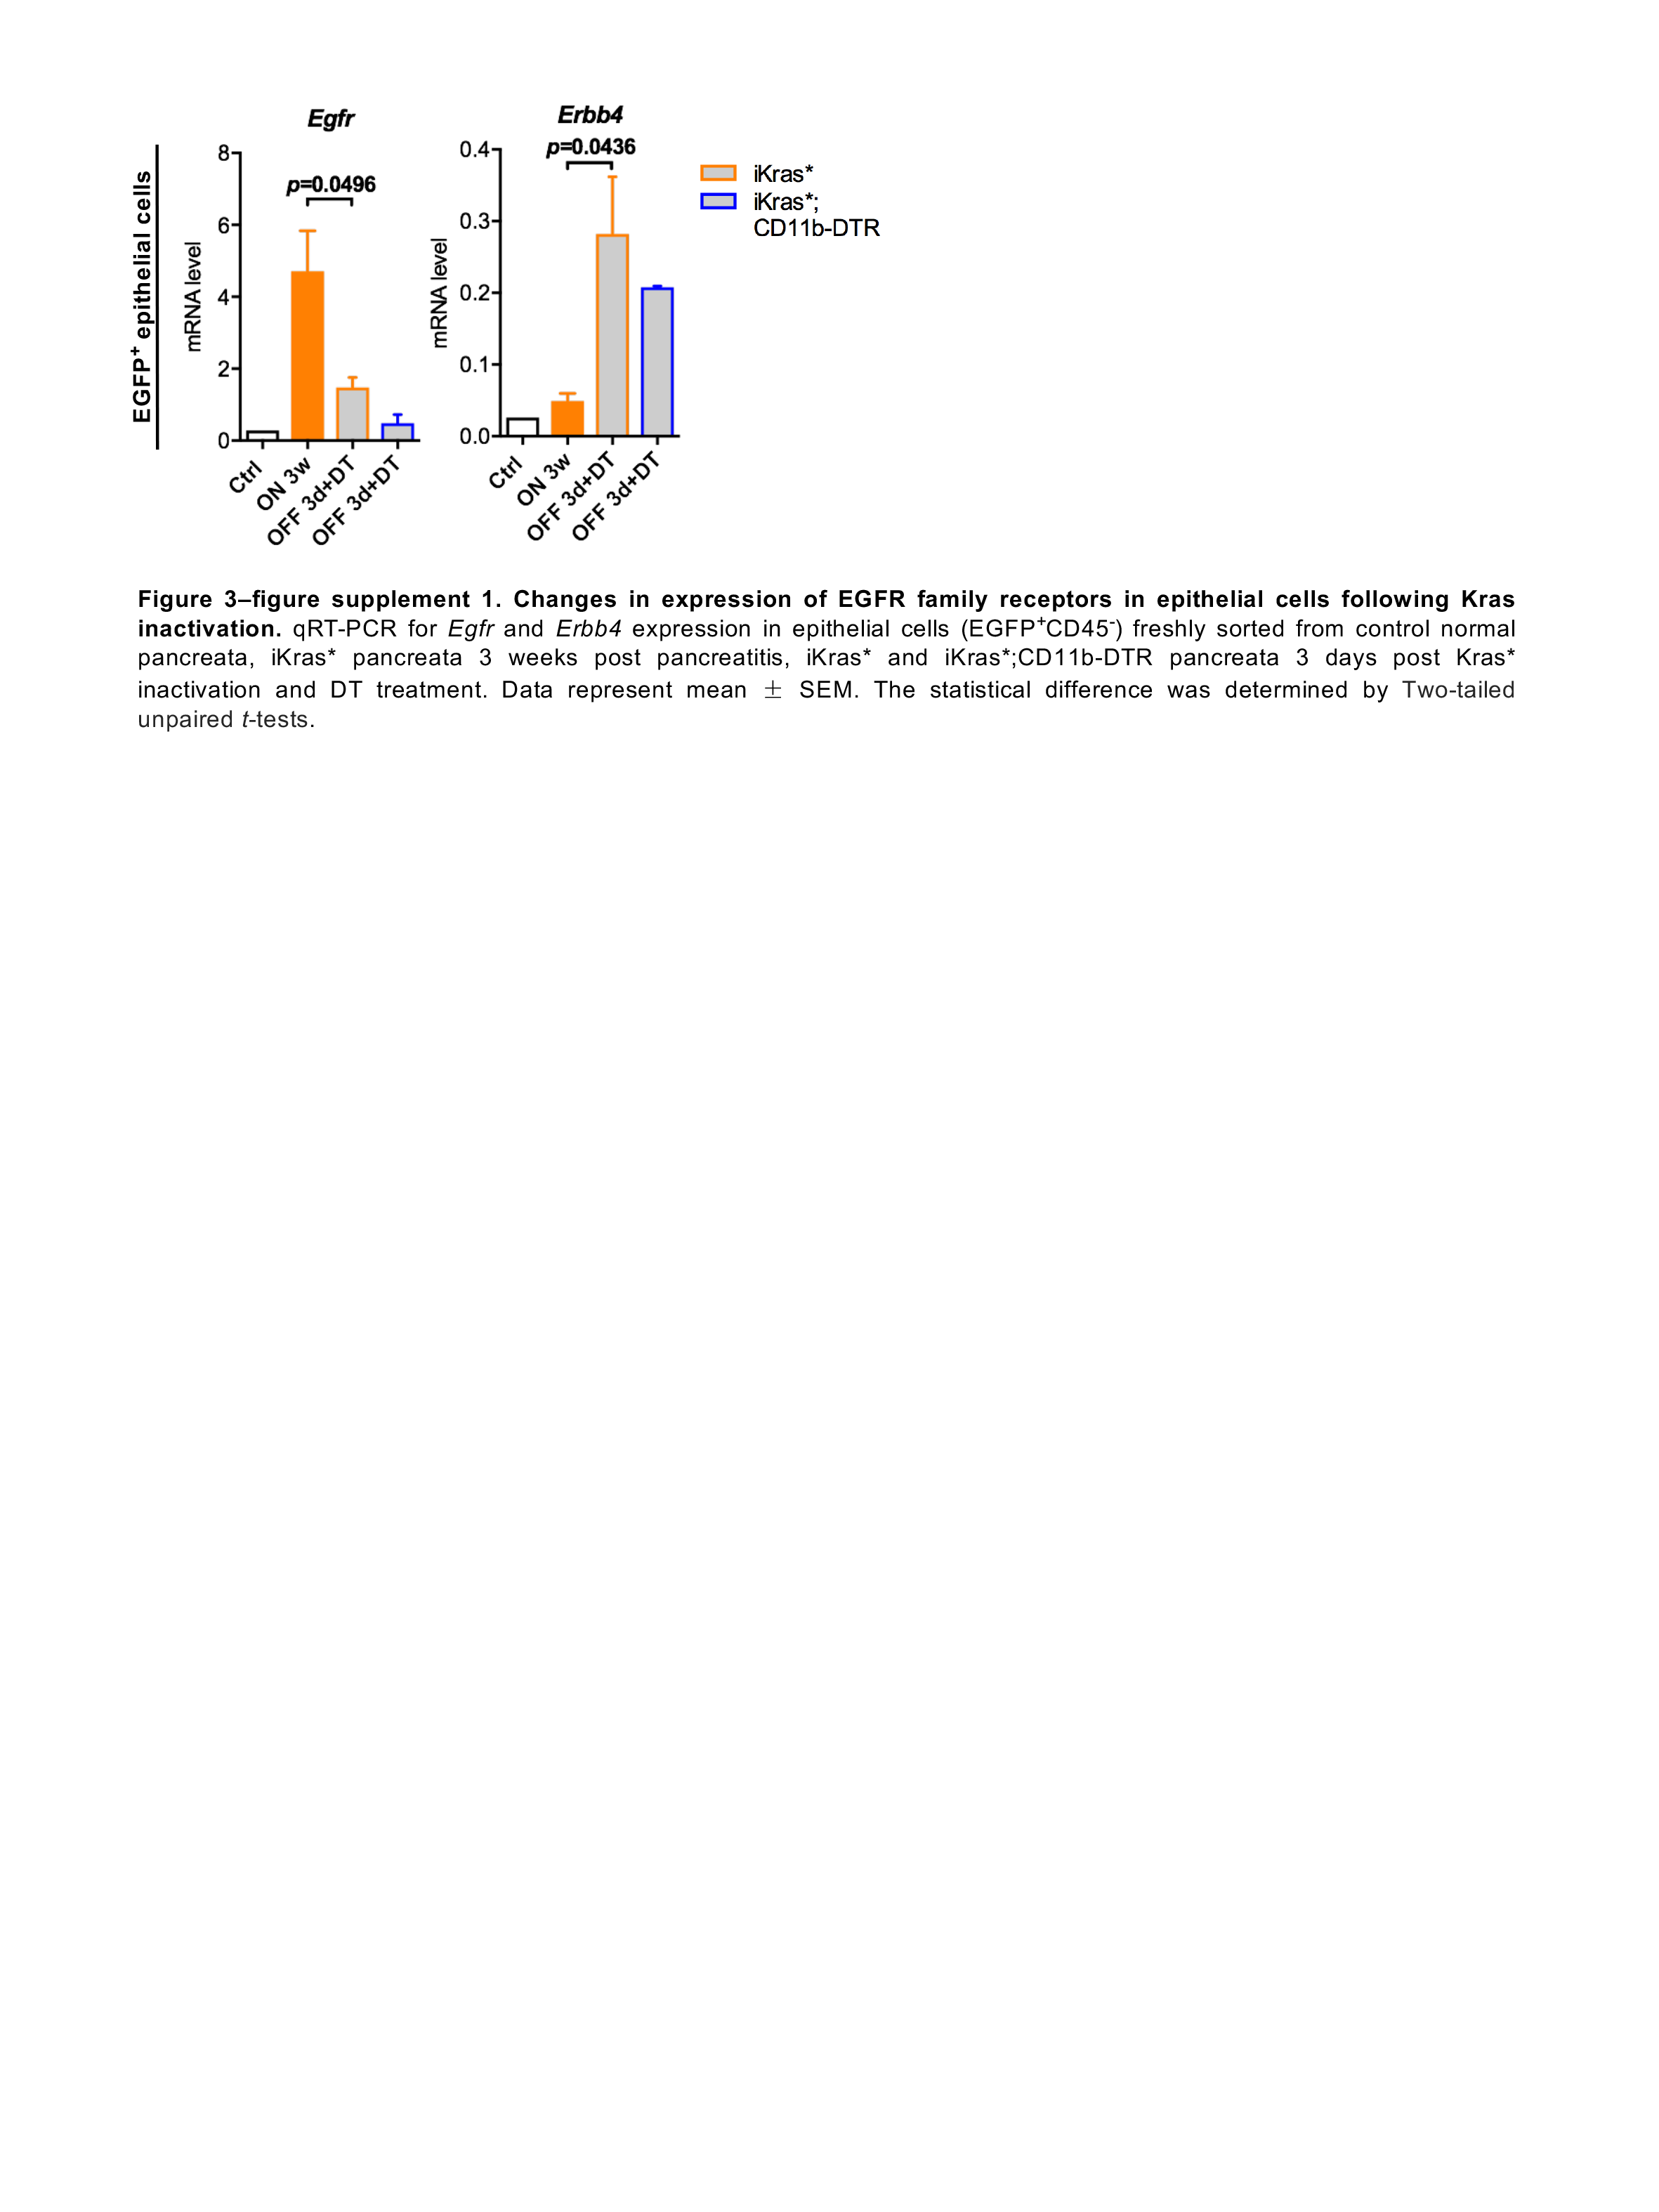

Supplement: supp [file elife-27388-supp-v1.zip › elife_poa_e27388_Figure_3_figure_supplement_1.tif]

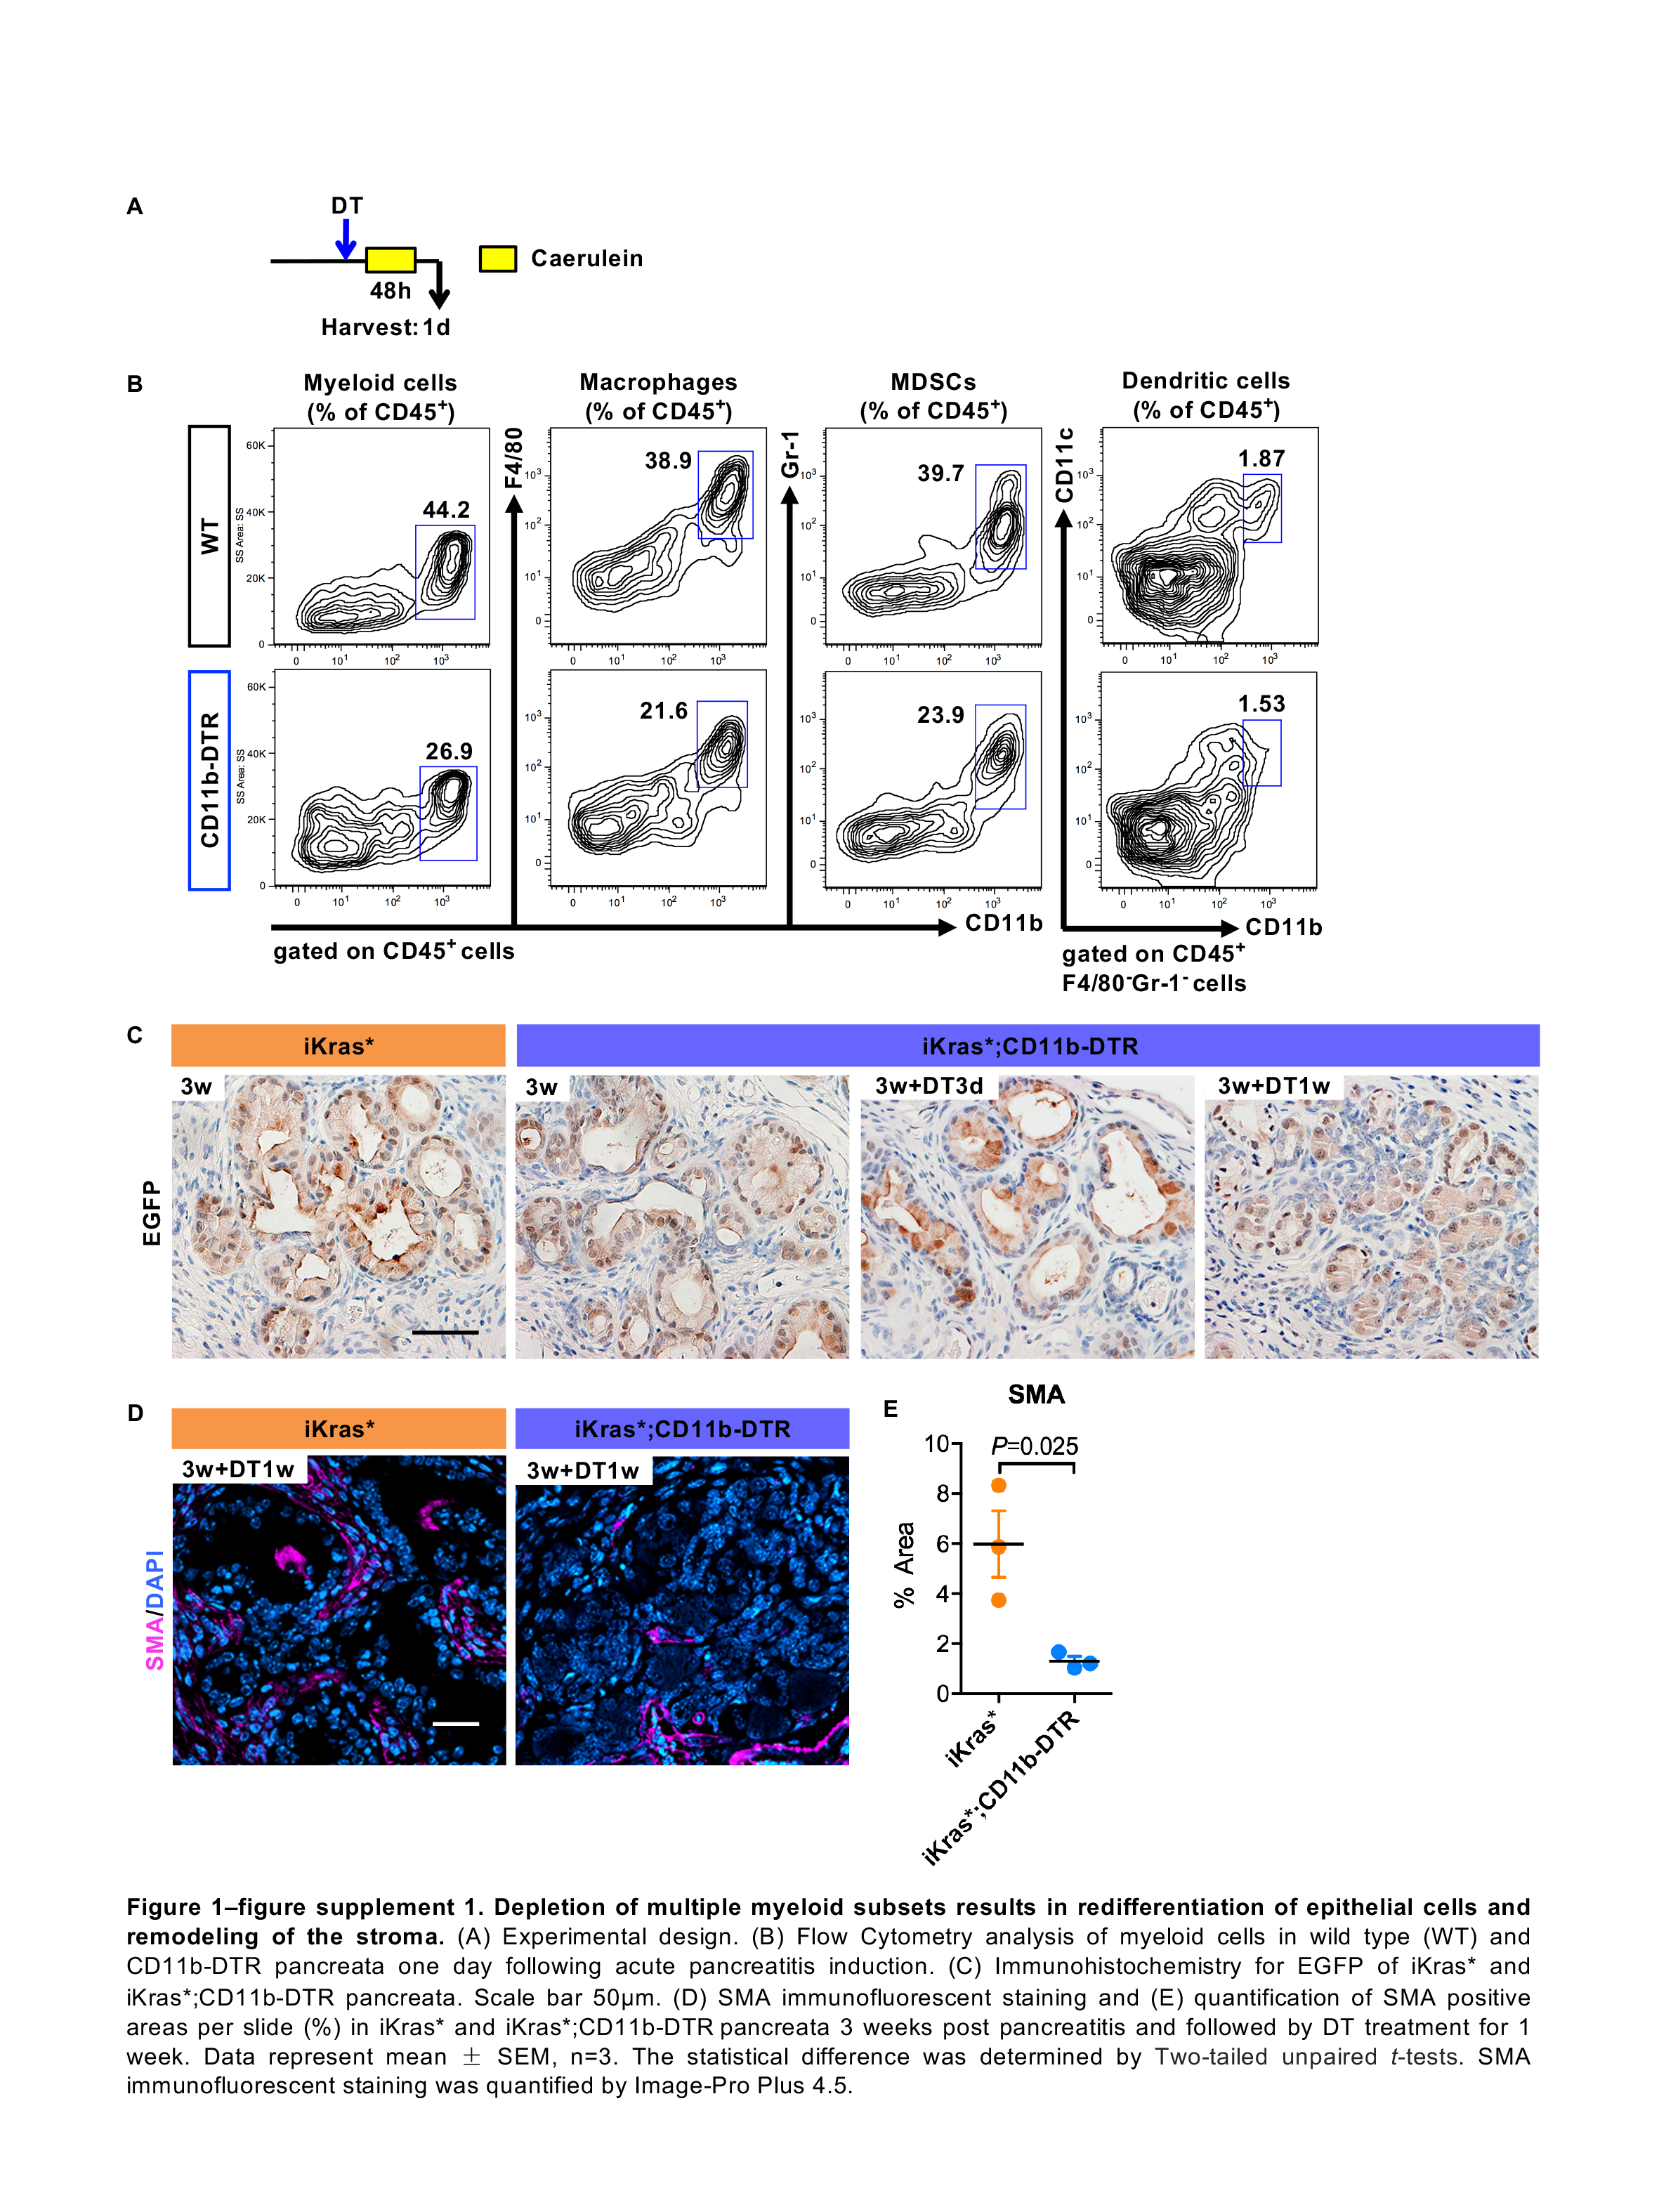

Supplement: supp [file elife-27388-supp-v1.zip › elife_poa_e27388_Figure1_figure_supplement_1.tif]

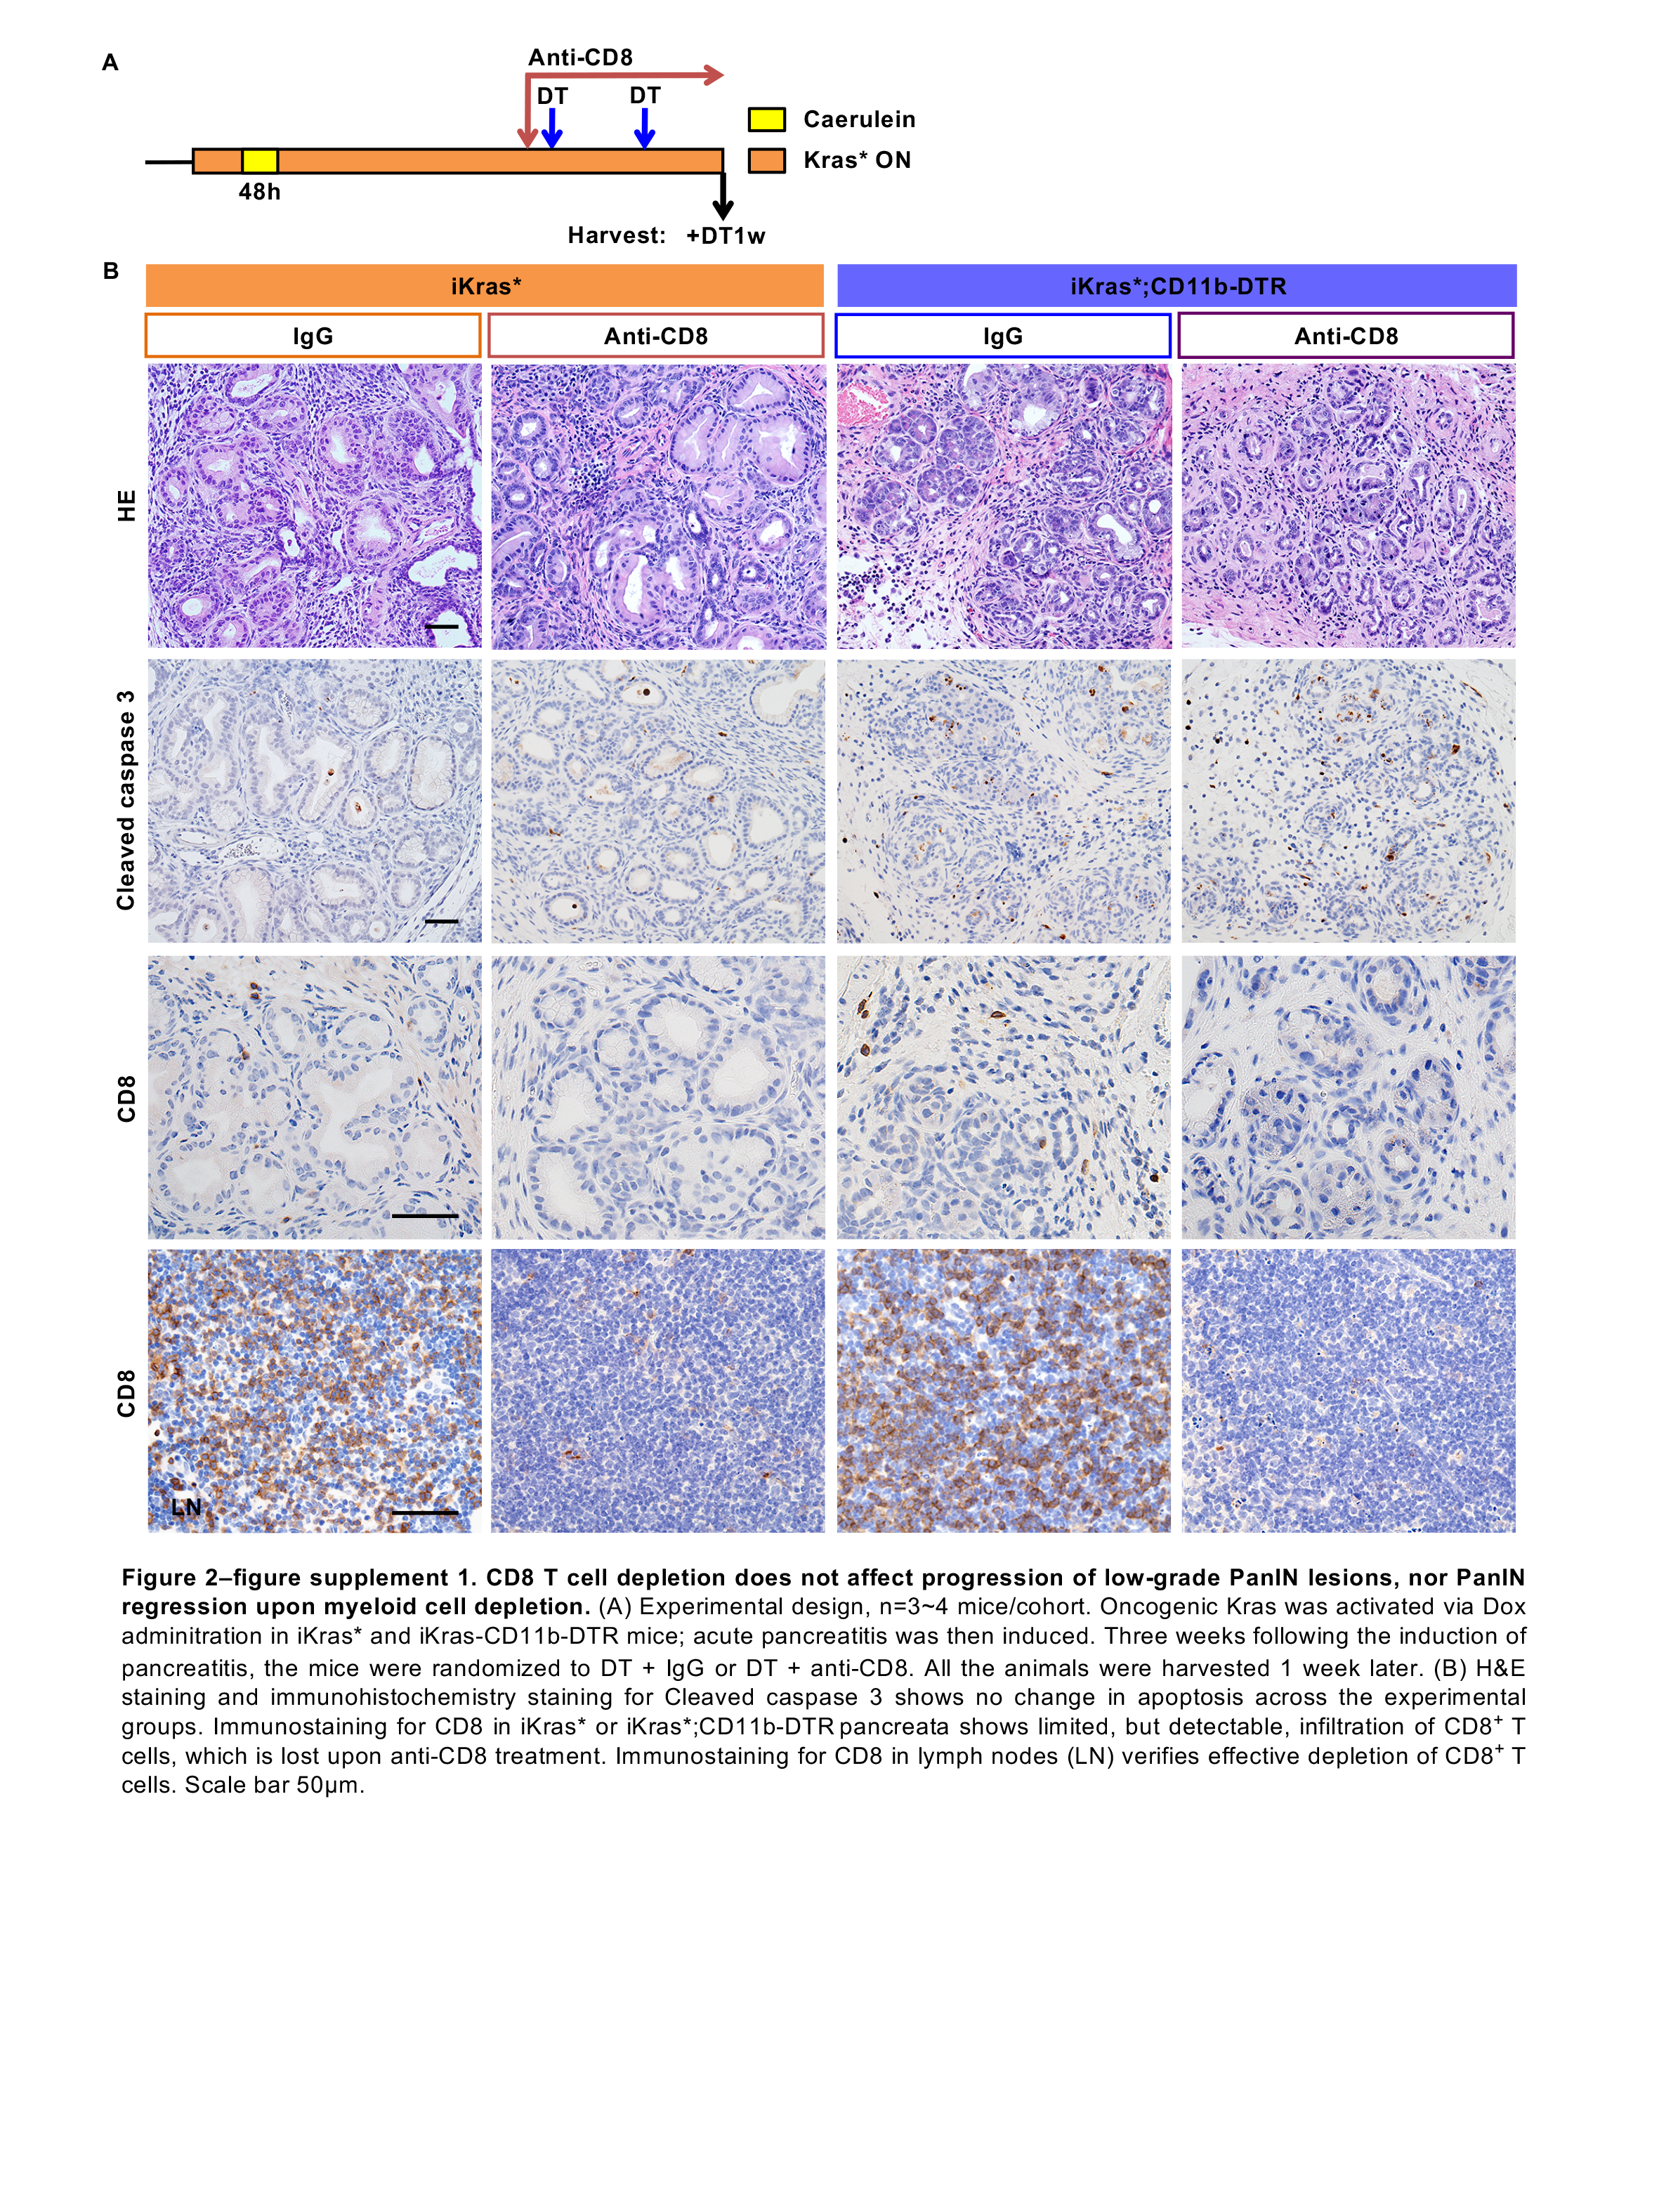

Supplement: supp [file elife-27388-supp-v1.zip › elife_poa_e27388_Figure_2_figure_supplement_1.tif]
